# Supplementary material for: Ultrasound-guided Hydrorelease/Hydrodissection Reduces Gliding Resistance in a Rat Sciatic Nerve Adhesion Model
Source: Research Square preprint supplement (doi:10.21203/rs.3.rs-7323150/v1), 2025-12-23
Supplement: Supplementary file 1 [file 4cc7647ff23bca952f2e8f82.xlsx]

## Sheet: Sheet1
	Tensile Strength(N)						Nerve Conduction Velocity										Tensile Strength(N)
		Control	1W	3W	6W			Dital CMAP (mV)			Proximal CMAP (mV)			MCV (m/sec)				Control	Adhesion	Adhesion＋Hydrorelease
		0.59	0.83	1.61	3.03			Right	Left		Right	Left		Right	Left			0.59	3.03	2.02
		1.29	2.8	1.5	2.81			Pre			Pre			Pre				1.29	2.81	1.9
		0.46	1.27	1.52	3.42			2.655	2.329		2.543	1.986		39.2	40.1			0.46	3.42	1.19
		1.12	0.88	2.55	3.63			4.115	3.579		5.393	3.126		34	39.7			1.12	3.63	2.3
		0.95	0.76	1.9	3.5			3.201	3.709		4.457	4.993		37.8	35.4			0.95	3.5	2.24
		0.93	0.53	1.73	3.07			5.199	6.739		4.789	8.086		35.9	42.9			0.93	3.07	2.47
		1	0.78	1.24	2.22			1.342	4.644		2.691	6.628		29.6	42.9			1	2.22	2.25
	Average	0.905714	1.12143	1.72143	3.09714			7.761	2.946		8.103	2.971		39.6	46.7		Average	0.905714	3.09714	2.05286
	SE	0.109476	0.291951	0.158286	0.183065			2.443	8.992		4.188	11.348		45.4	42.9		SE	0.109476	0.183065	0.160204
								2.923	3.047		3.489	3.691		42.6	42.6
							Average	3.70488	4.49812		4.45662	5.35363		38.0125	41.65
							SE	0.707053	0.80095		0.627796	1.11721		1.74708	1.16772
